# Supplementary material for: Unraveling the effect of single atom catalysts on the charging behavior of nonaqueous Mg–CO2 batteries: a combined density functional theory and machine learning approach
Source: Royal Society of Chemistry journal article supplement (doi:10.1039/d3ta06742d), 2023-12-18
Supplement: d3ta06742d1.pdf [file d3ta06742d1.pdf]

# **Unraveling the Role of Single Atom Catalysts on the Charging Behavior of Nonaqueous Mg-CO<sub>2</sub> Batteries: A Combined Density Functional Theory and Machine Learning Approach**

Raffiuzzaman Pritom<sup>a</sup>, Rahul Jayan<sup>a</sup> and Md Mahbubul Islam\*

Department of Mechanical Engineering, Wayne State University, Detroit, MI – 48202, USA

<sup>a</sup> both authors contributed equally towards this work

\*Corresponding Author: [gy5553@wayne.edu](mailto:gy5553@wayne.edu)

**Table S1.** The computed lattice constants of 3d SACs doped N<sub>4</sub>, N<sub>3</sub>S and N<sub>2</sub>S<sub>2</sub> substrates

| SACs | TM-N <sub>4</sub> | TM-N <sub>3</sub> S | TM-N <sub>2</sub> S <sub>2</sub> |
|------|-------------------|---------------------|----------------------------------|
|      | Å                 | Å                   | Å                                |
| Sc   | 8.478             | 8.596               | 8.478                            |
| Ti   | 8.420             | 8.550               | 8.703                            |
| V    | 8.408             | 8.530               | 8.659                            |
| Cr   | 8.370             | 8.517               | 8.635                            |
| Mn   | 8.371             | 8.494               | 8.620                            |
| Fe   | 8.348             | 8.468               | 8.590                            |
| Co   | 8.329             | 8.449               | 8.577                            |
| Ni   | 8.327             | 8.417               | 8.622                            |
| Cu   | 8.380             | 8.459               | 8.486                            |

**Table S2.** The computed lattice constants of 4d SACs doped N<sub>4</sub>, N<sub>3</sub>S and N<sub>2</sub>S<sub>2</sub> substrates

| SACs | TM-N <sub>4</sub> | TM-N <sub>3</sub> S | TM-N <sub>2</sub> S <sub>2</sub> |
|------|-------------------|---------------------|----------------------------------|
|      | Å                 | Å                   | Å                                |
| Y    | 8.464             | 8.504               | 8.527                            |
| Zr   | 8.500             | 8.497               | 8.555                            |
| Nb   | 8.465             | 8.605               | 8.559                            |
| Mo   | 8.437             | 8.561               | 8.702                            |
| Tc   | 8.422             | 8.528               | 8.678                            |
| Ru   | 8.390             | 8.512               | 8.646                            |
| Rh   | 8.382             | 8.510               | 8.646                            |
| Pd   | 8.388             | 8.518               | 8.491                            |
| Ag   | 8.432             | 8.500               | 8.581                            |

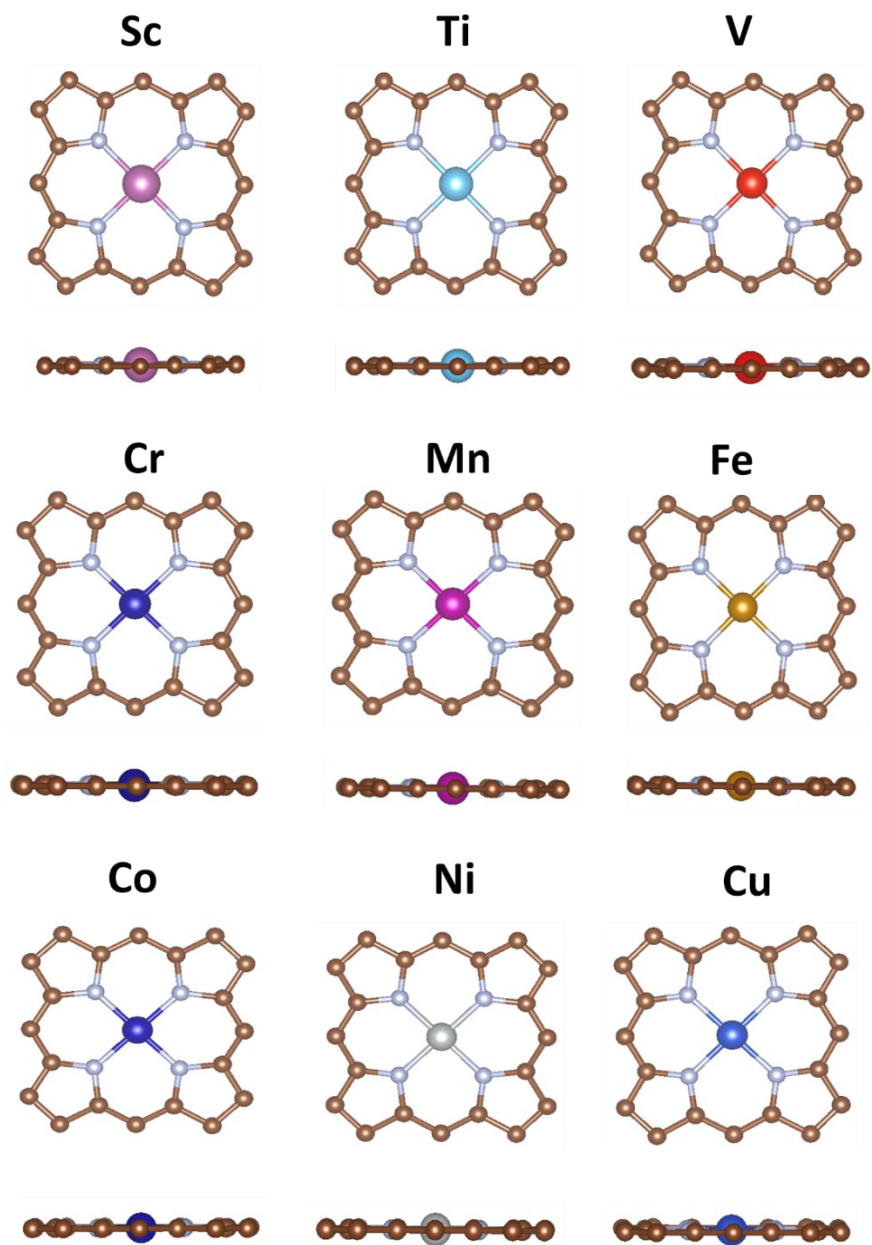

**Figure S1.** The top and side views of the optimized geometric configurations of 3d SACs doped  $N_4$  environment

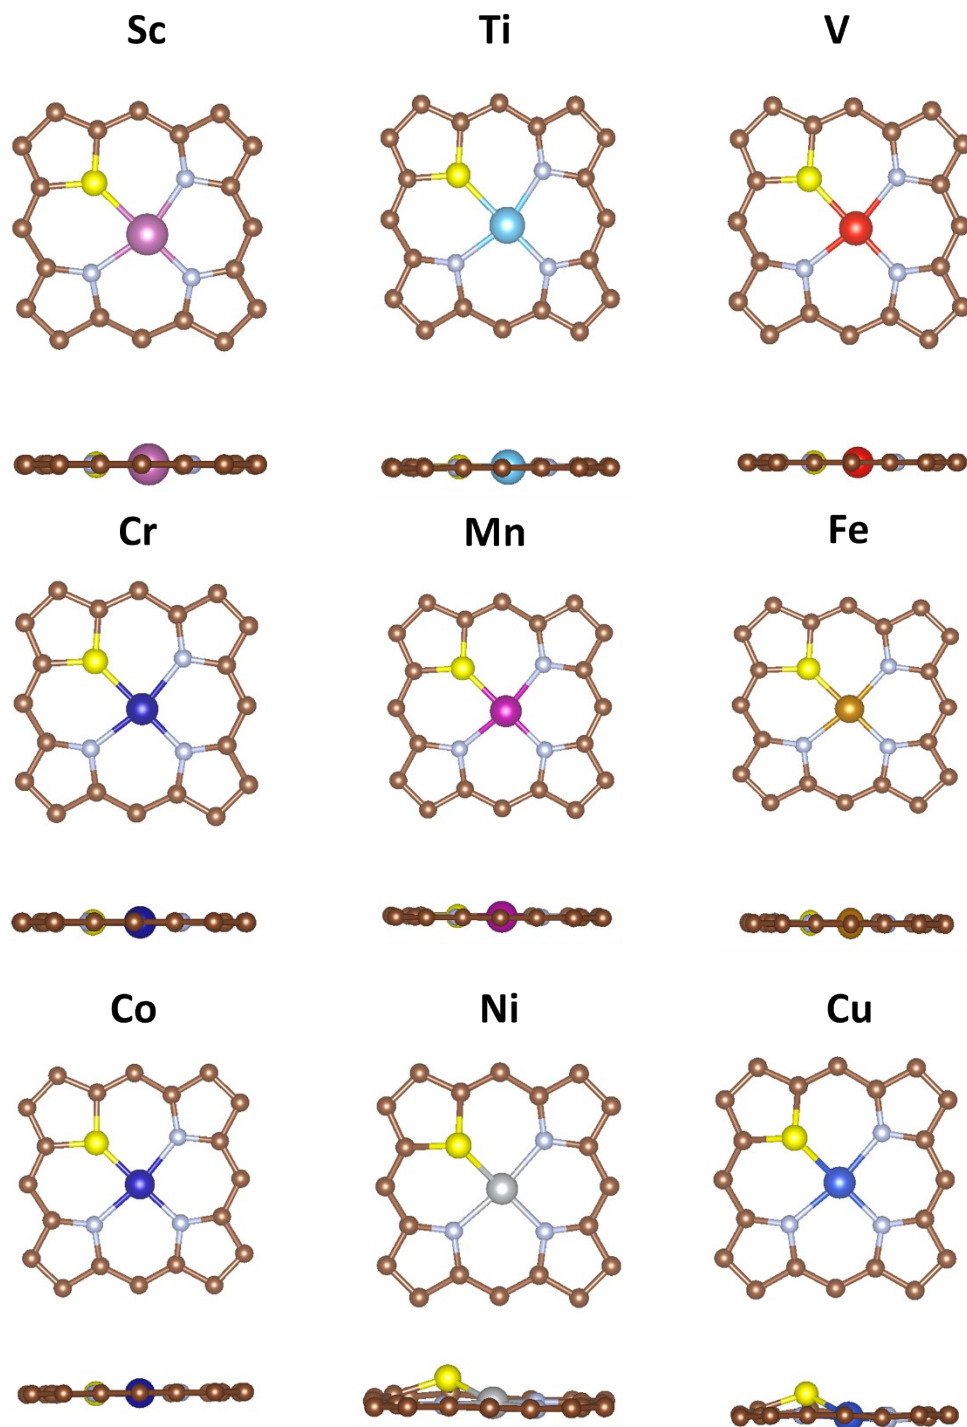

**Figure S2.** The top and side views of the optimized geometric configurations of 3d SACs doped N<sub>3</sub>S environment

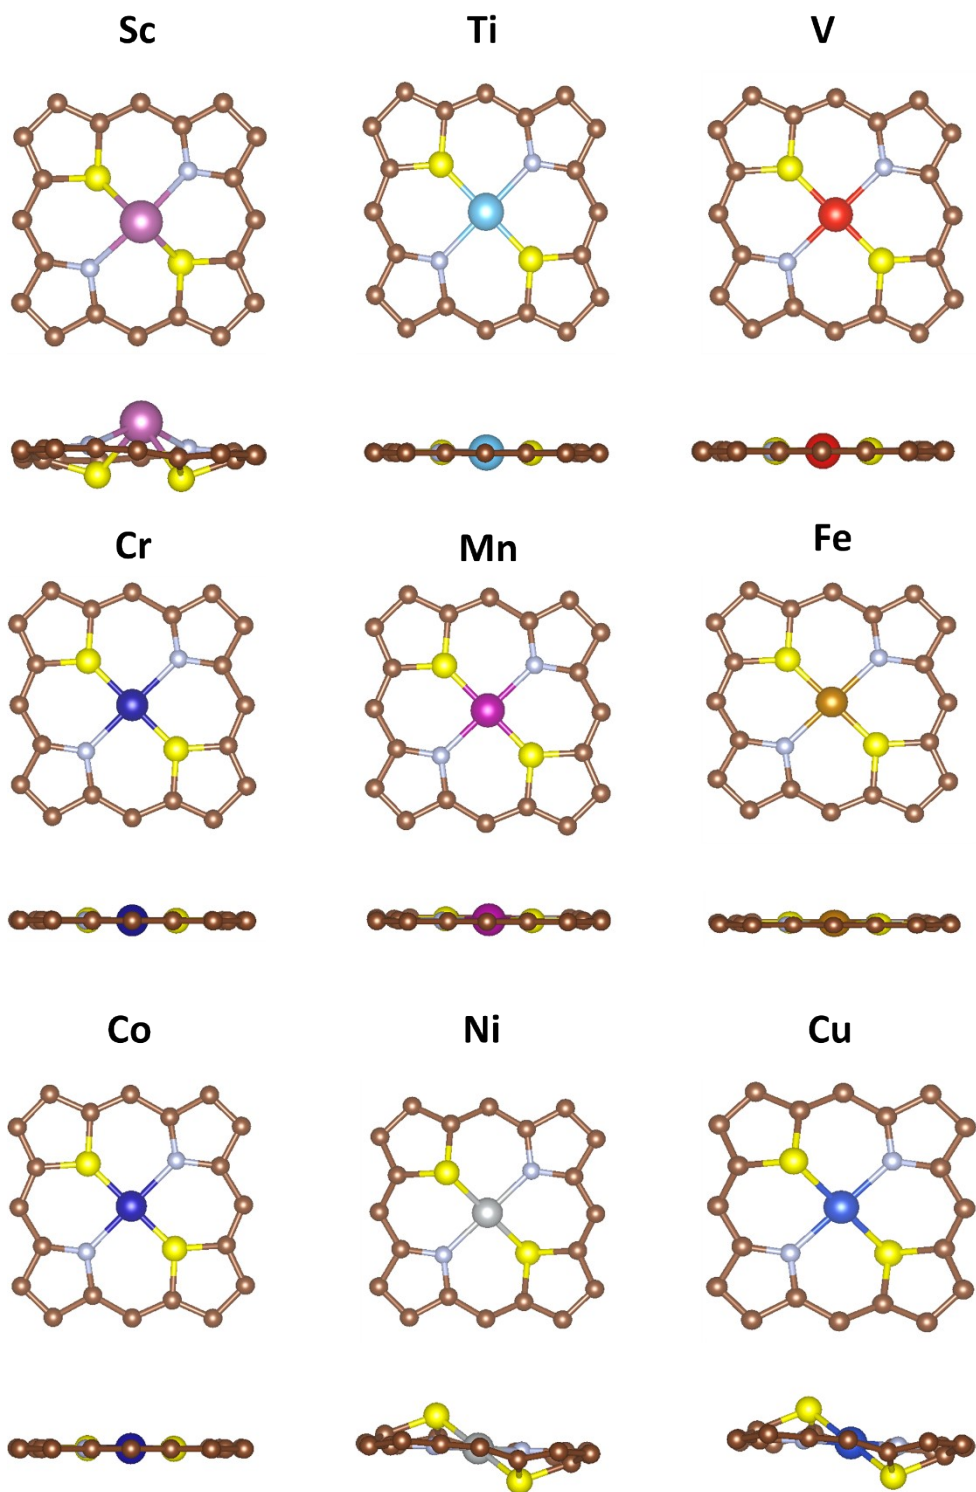

**Figure S3.** The top and side views of the optimized geometric configurations of 3d SACs doped  $N_2S_2$  environment

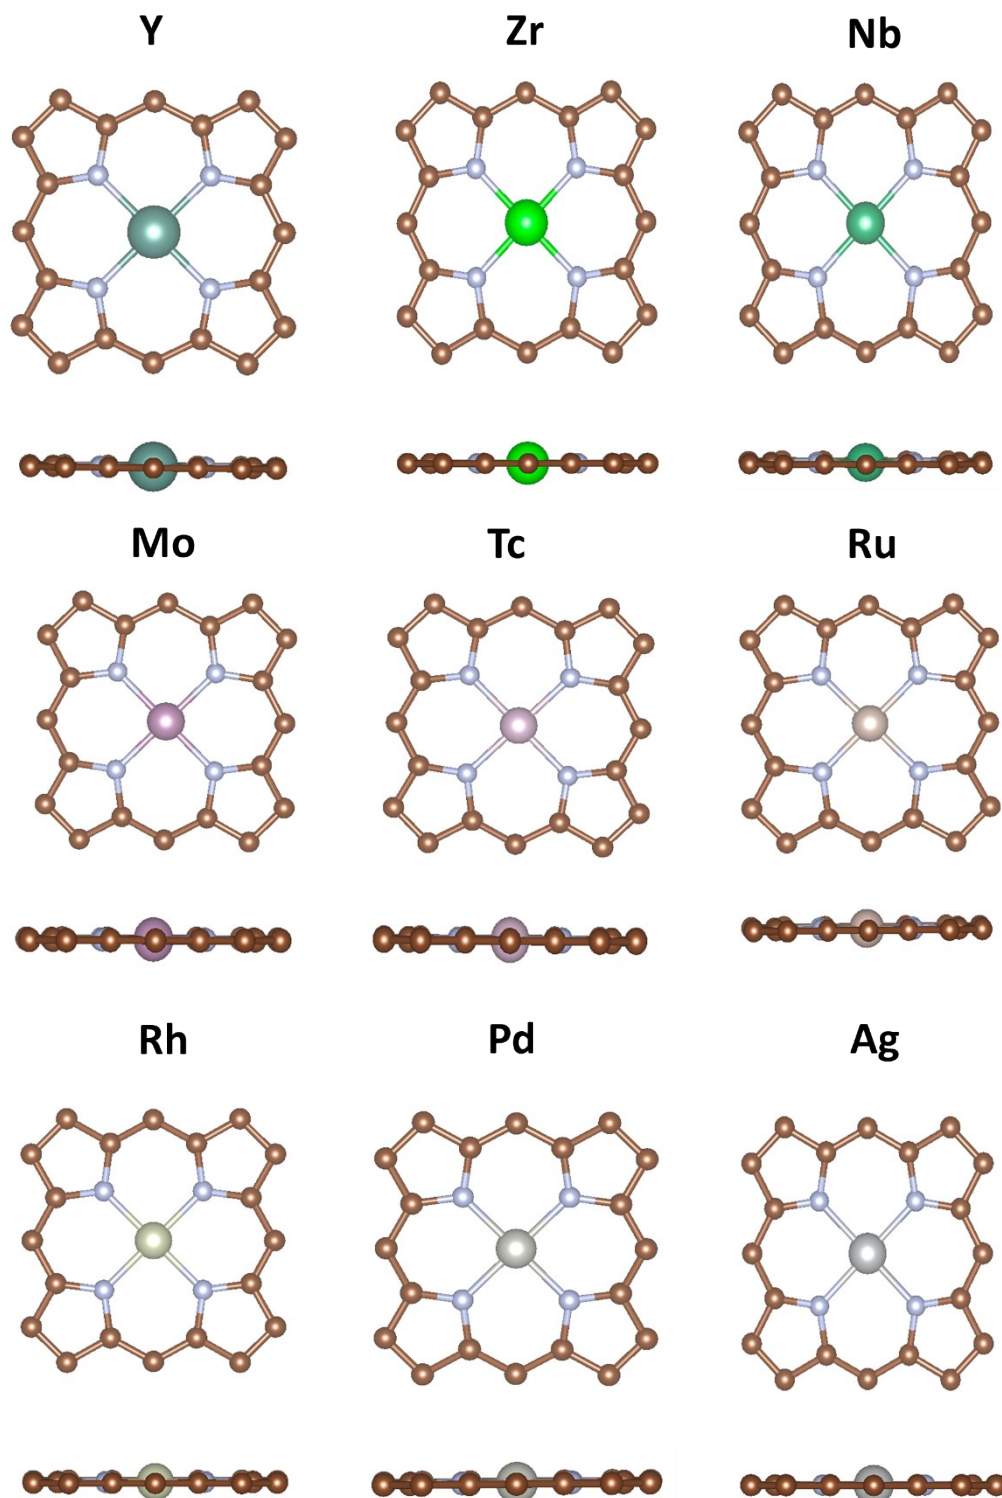

**Figure S4.** The top and side views of the optimized geometric configurations of 4d SACs doped  $N_4$  environment



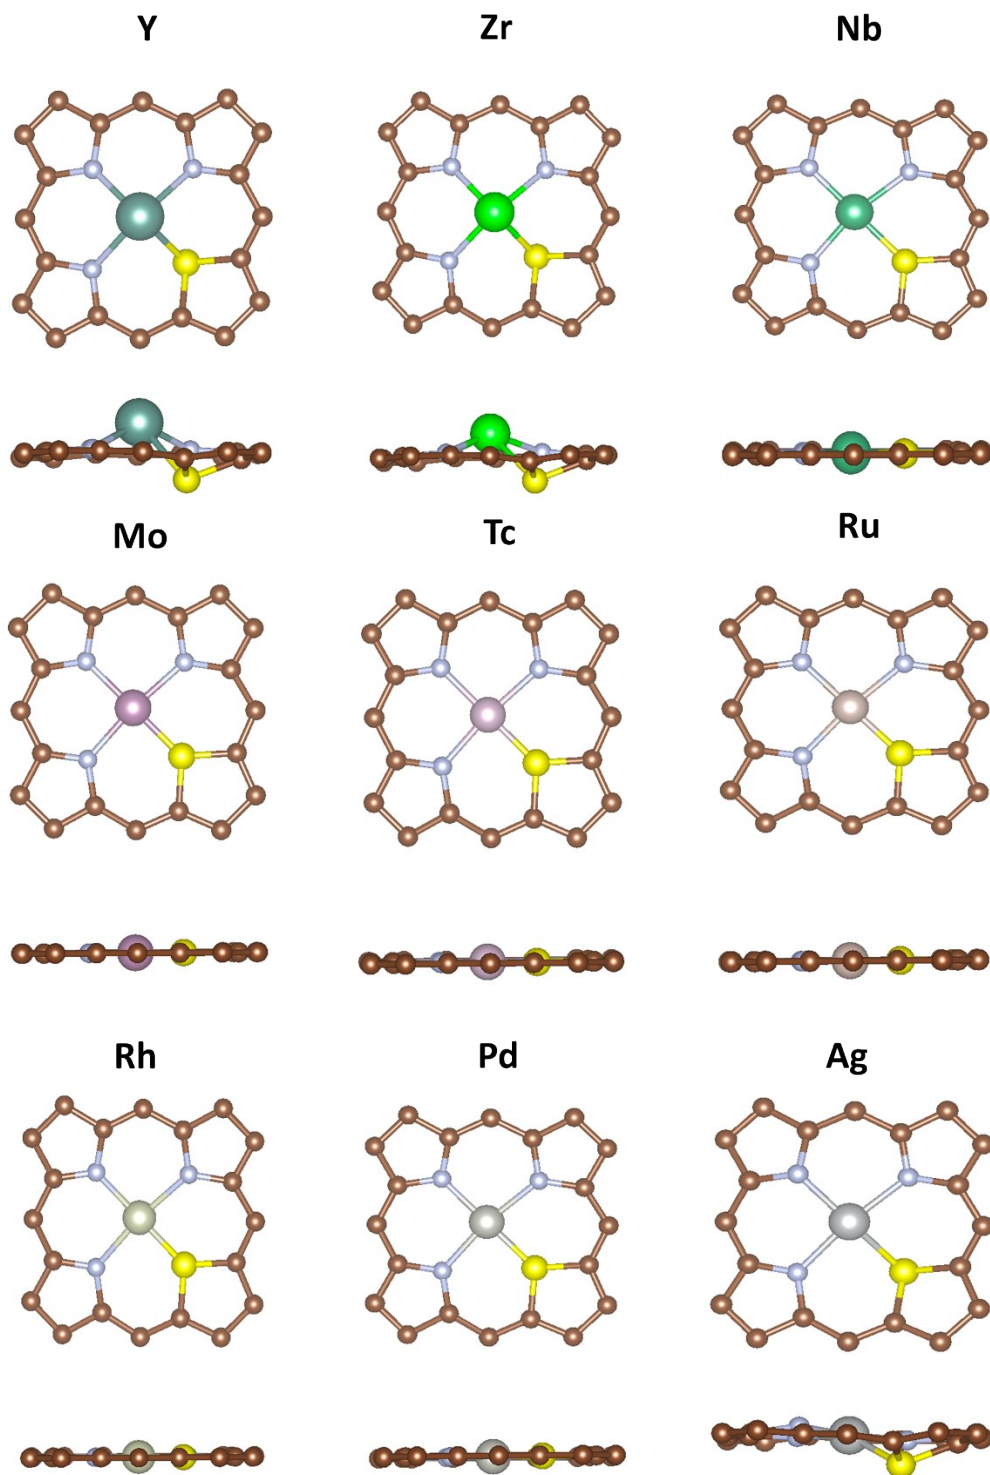

**Figure S5.** The top and side views of the optimized geometric configurations of 4d SACs doped  $N_3S$  environment

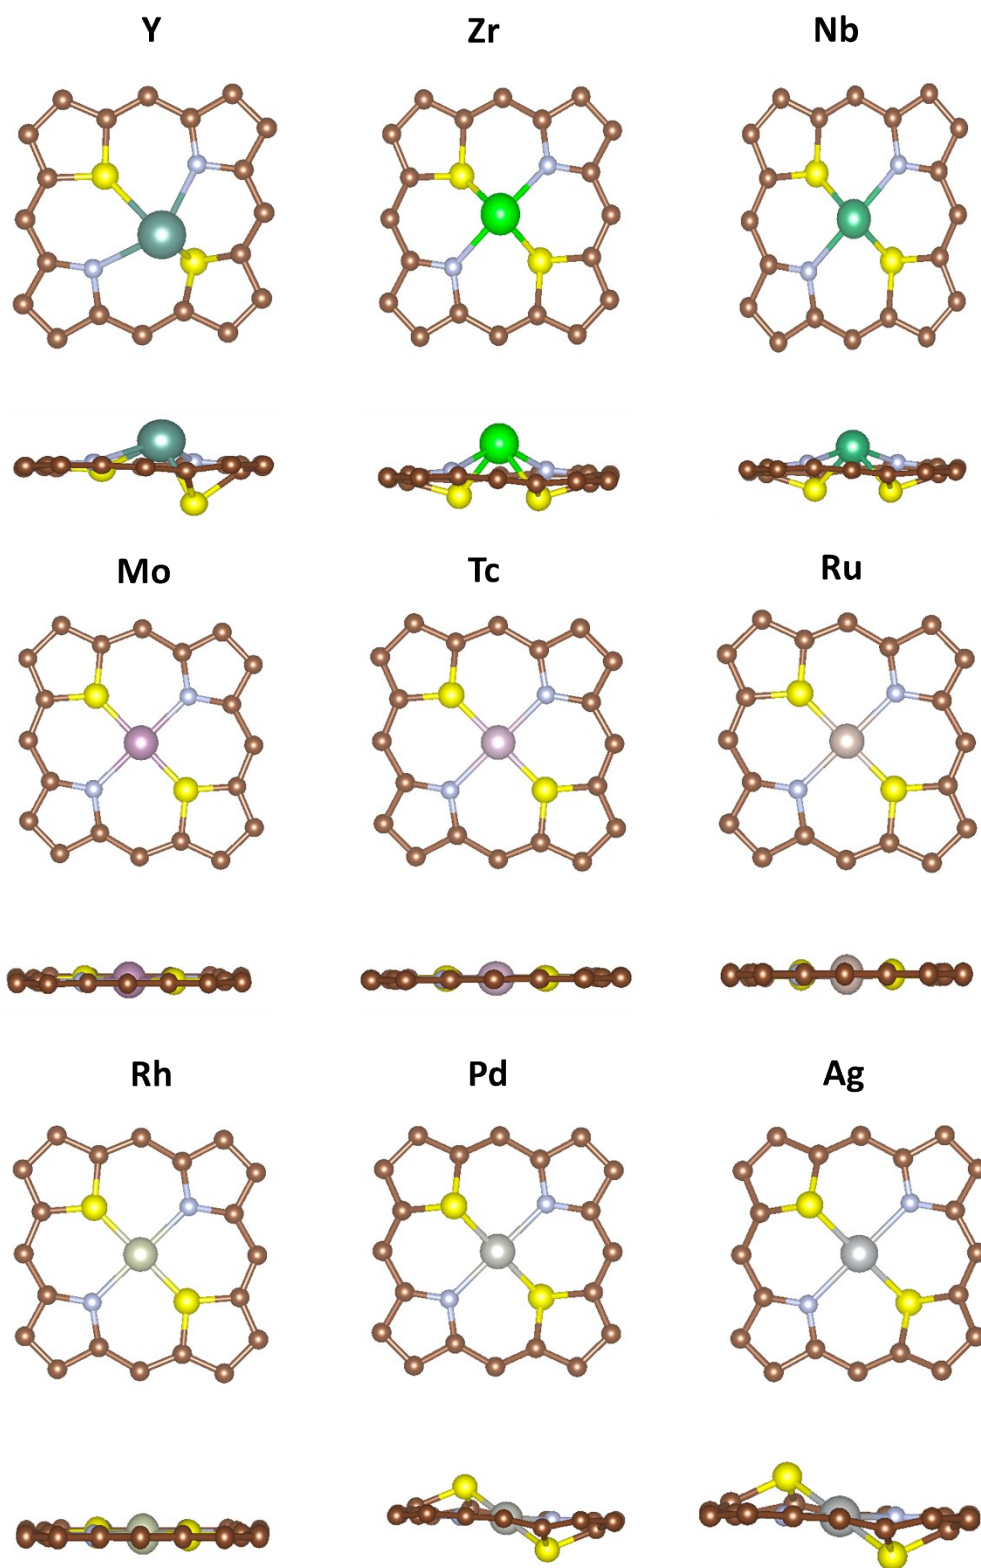

**Figure S6.** The top and side views of the optimized geometric configurations of 4d SACs doped  $N_2S_2$  environment



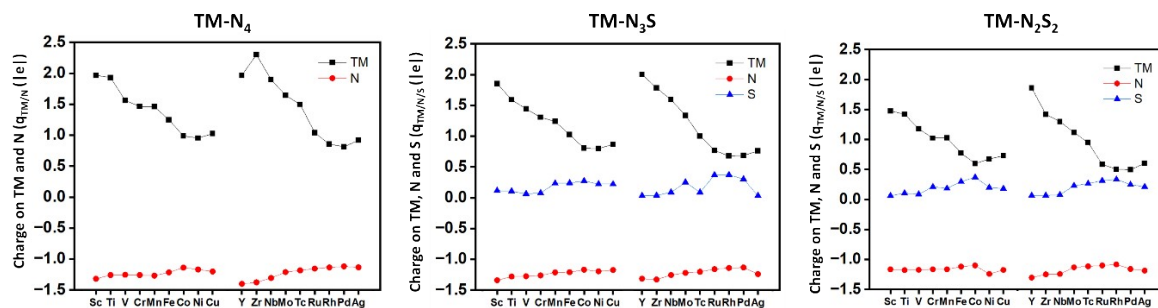

**Figure S7.** The computed charge transfer of TM, N and S on 3d and 4d SACs doped  $N_4$ ,  $N_3S$  and  $N_2S_2$  substrates

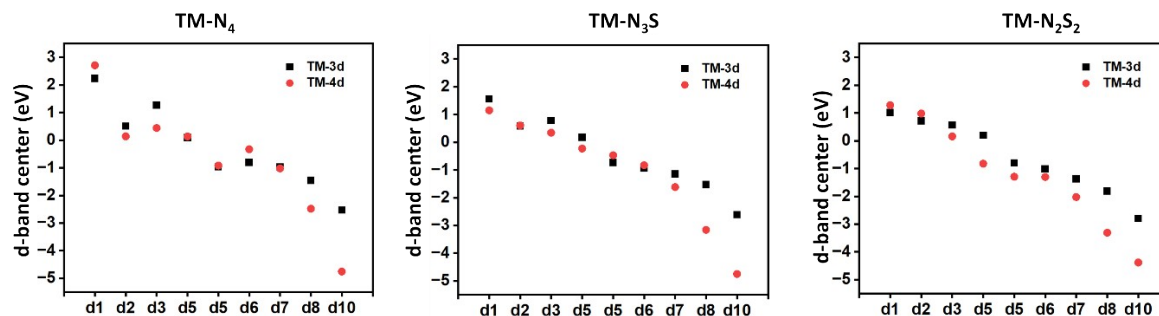

**Figure S8.** The calculated d-band center of both 3d and 4d SACs doped  $N_4$ ,  $N_3S$  and  $N_2S_2$  substrates

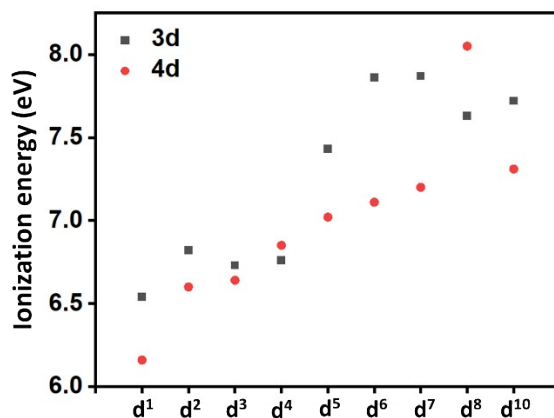

**Figure S9.** The correlation of ionization energy of both 3d and 4d SACs with the number of d-electrons

### 3d SACs@PP

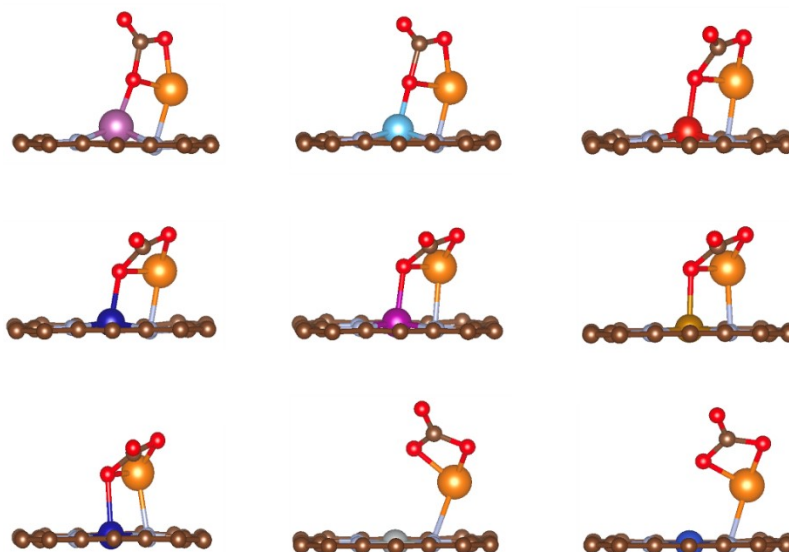

### 4d SACs@PP

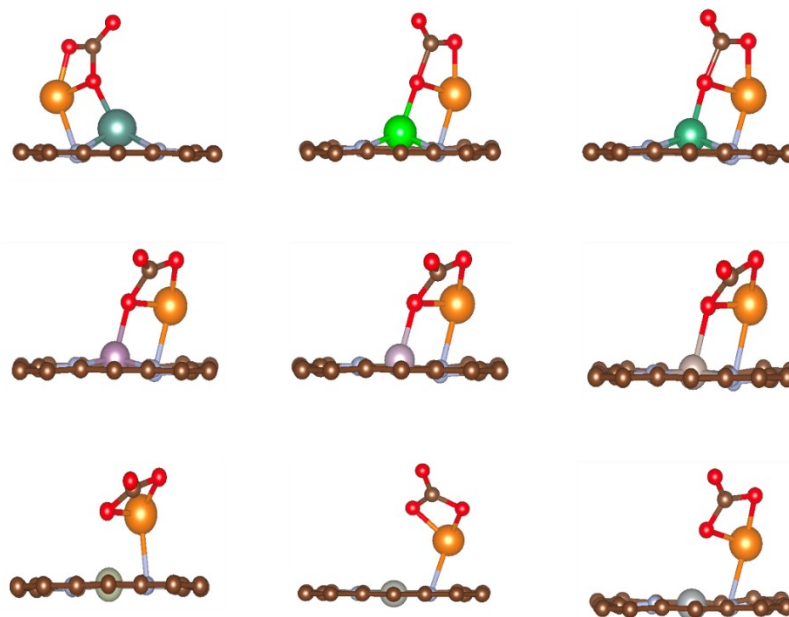

**Figure S10.** The side views of the optimized geometric configurations of MgCO<sub>3</sub> adsorbed on 3d and 4d SACs doped N<sub>4</sub> environment

### 3d SACs@PP

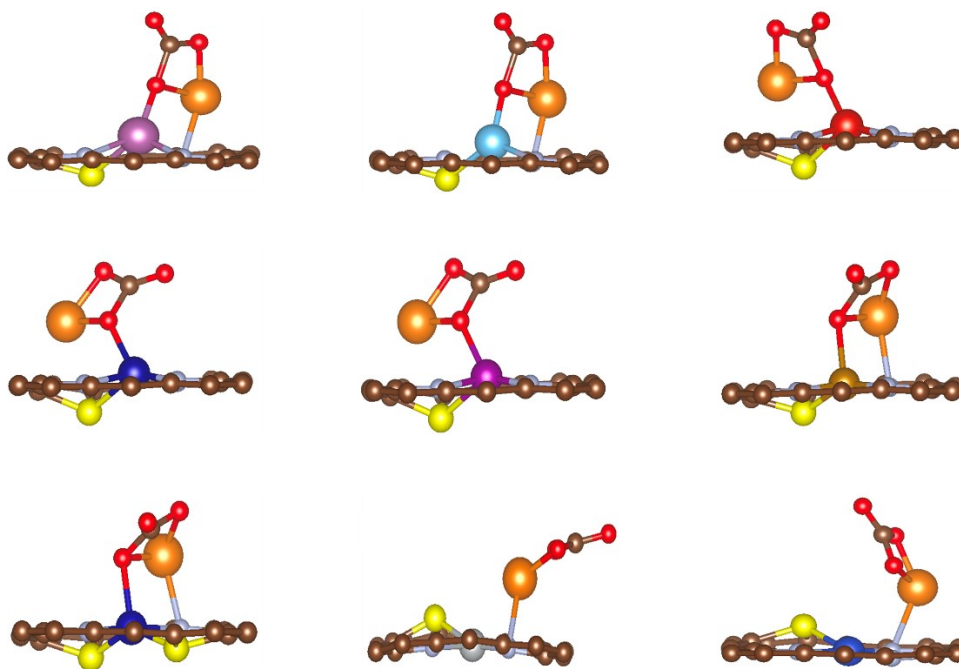

### 4d SACs@PP

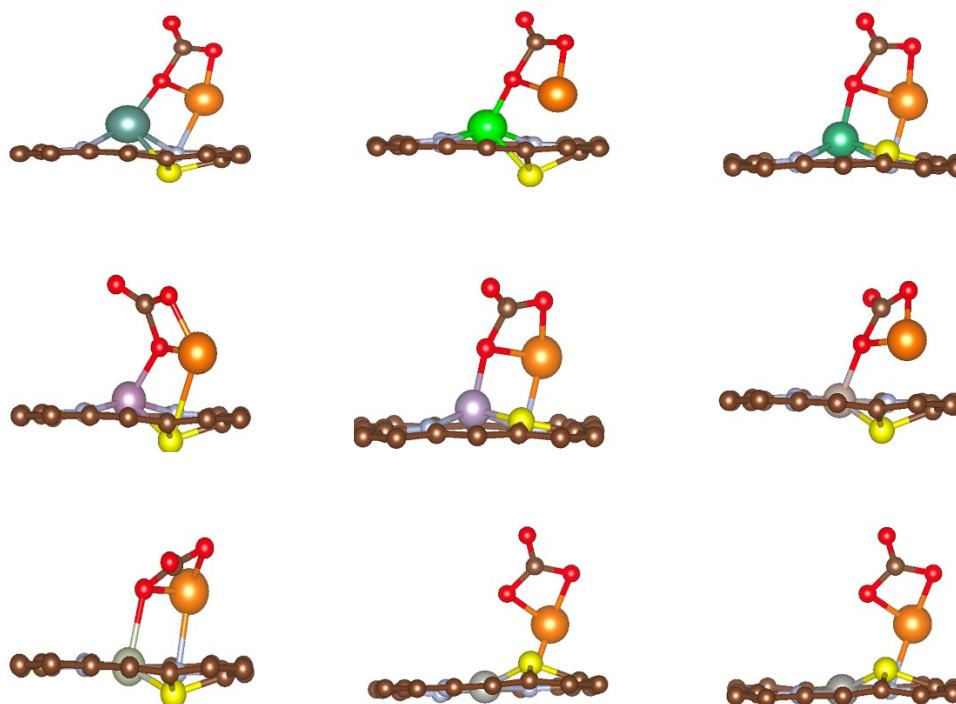

**Figure S11.** The side views of the optimized geometric configurations of  $\text{MgCO}_3$  adsorbed on 3d and 4d SACs doped  $\text{N}_3\text{S}$  environment

### 3d SACs@PP

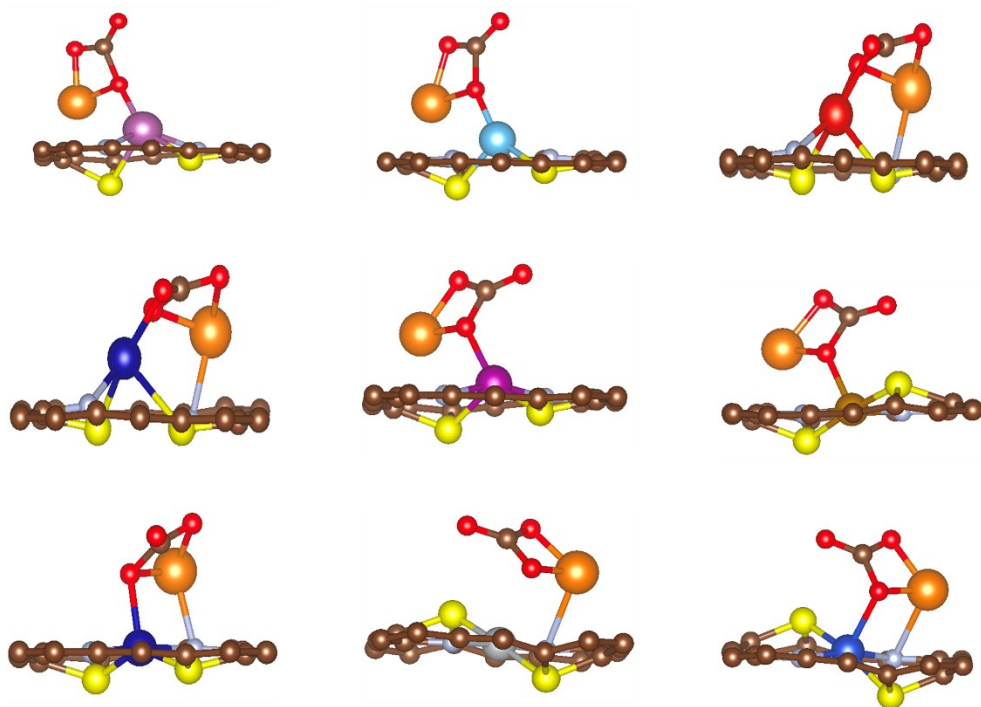

### 4d SACs@PP

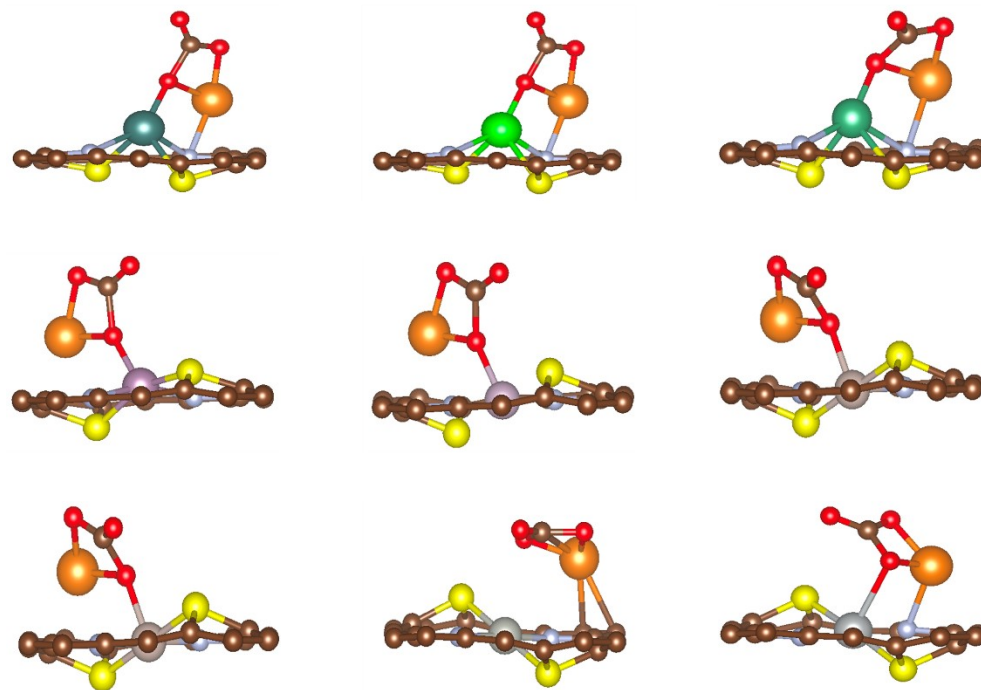

**Figure S12.** The side views of the optimized geometric configurations of  $\text{MgCO}_3$  adsorbed on 3d and 4d SACs doped  $\text{N}_2\text{S}_2$  environment

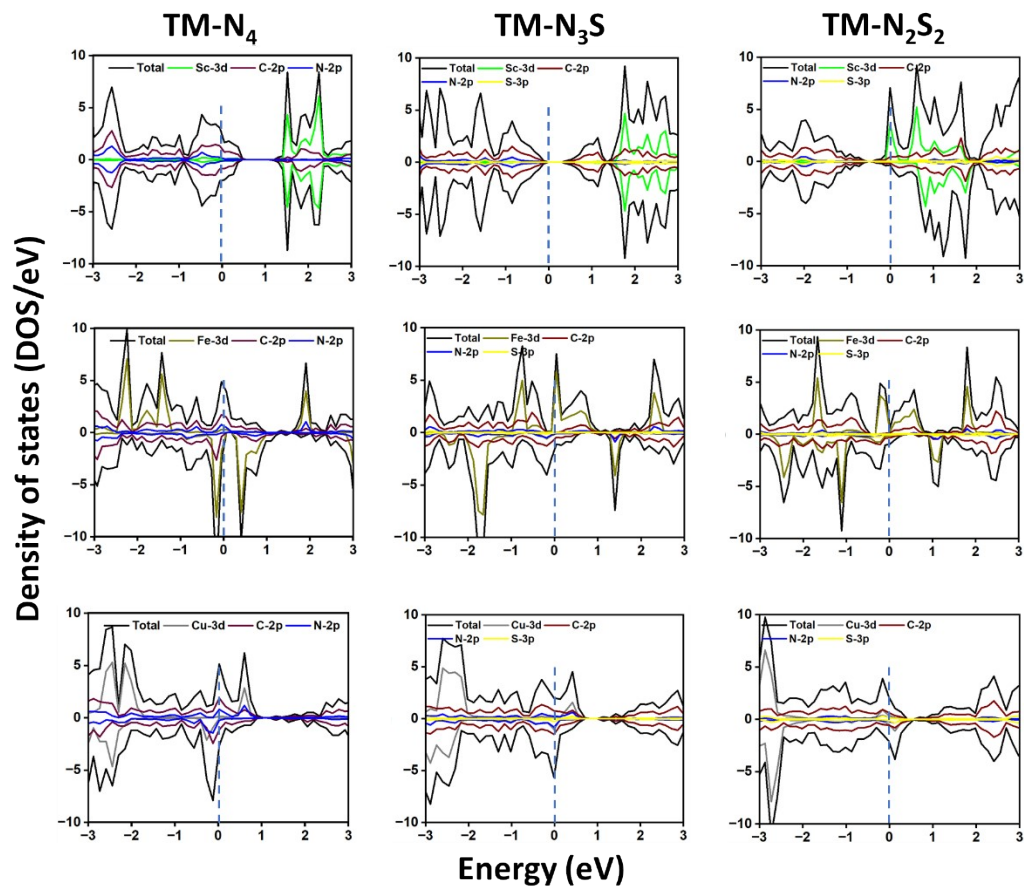

**Figure S13.** Projected density of states (PDOS) of representative early (Sc), mid (Fe) and late (Cu) 3d-TM doped  $N_4$ ,  $N_3S$  and  $N_2S_2$  substrates

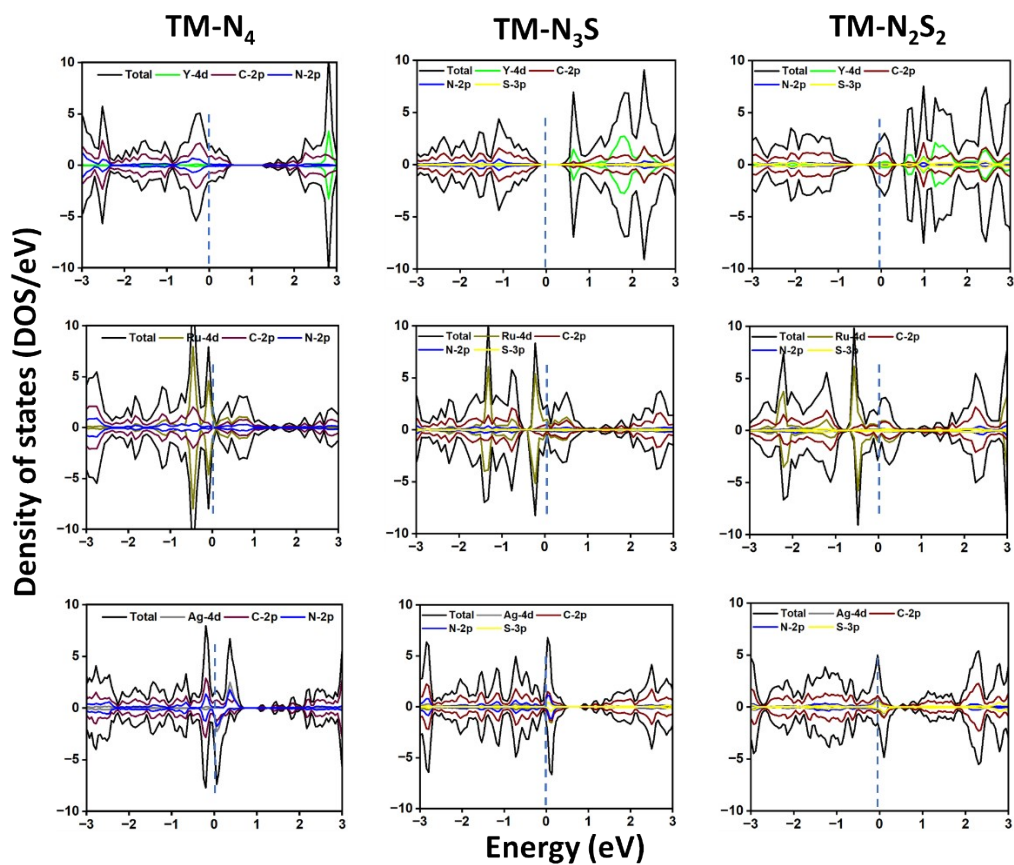

**Figure S14.** Projected density of states (PDOS) of representative early (Y), mid (Ru) and late (Ag) 4d-TM doped  $N_4$ ,  $N_3S$  and  $N_2S_2$  substrates



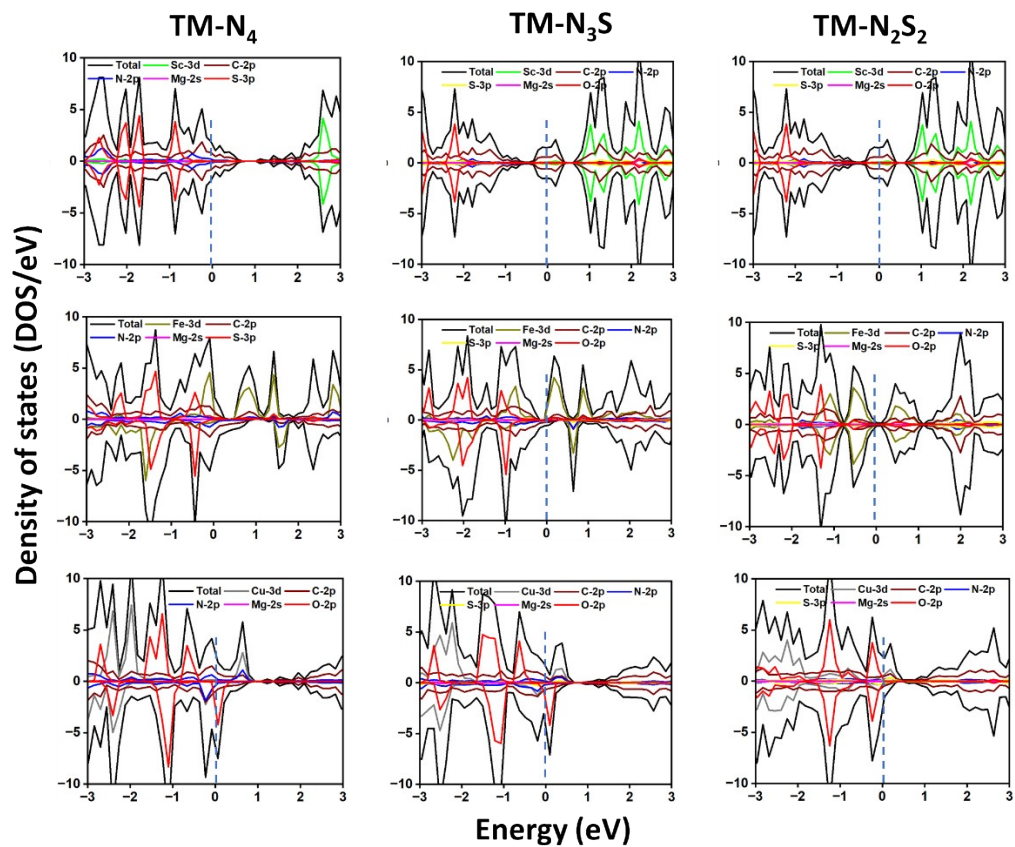

**Figure S15.** Projected density of states (PDOS) of MgCO<sub>3</sub> adsorbed Sc, Fe and Cu TM doped N<sub>4</sub>, N<sub>3</sub>S and N<sub>2</sub>S<sub>2</sub> substrates.

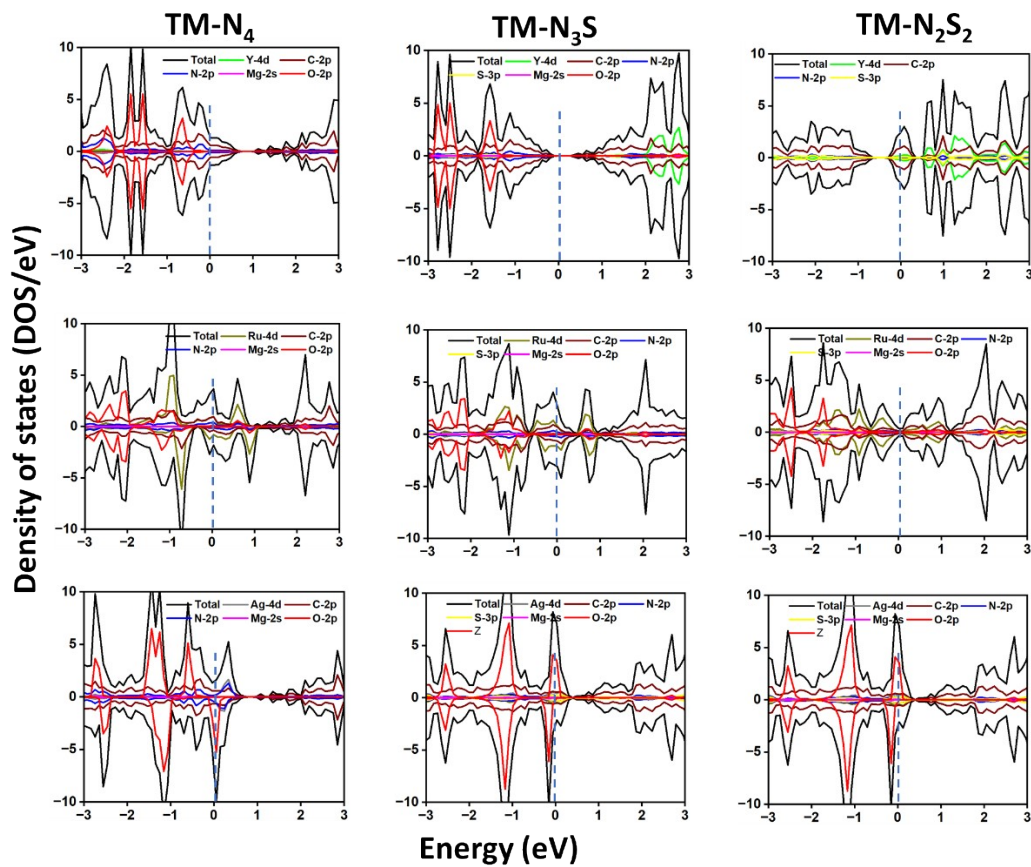

**Figure S16.** Projected density of states (PDOS) of  $\text{MgCO}_3$  adsorbed Y, Ru and Ag TM doped  $\text{N}_4$ ,  $\text{N}_3\text{S}$  and  $\text{N}_2\text{S}_2$  substrates.

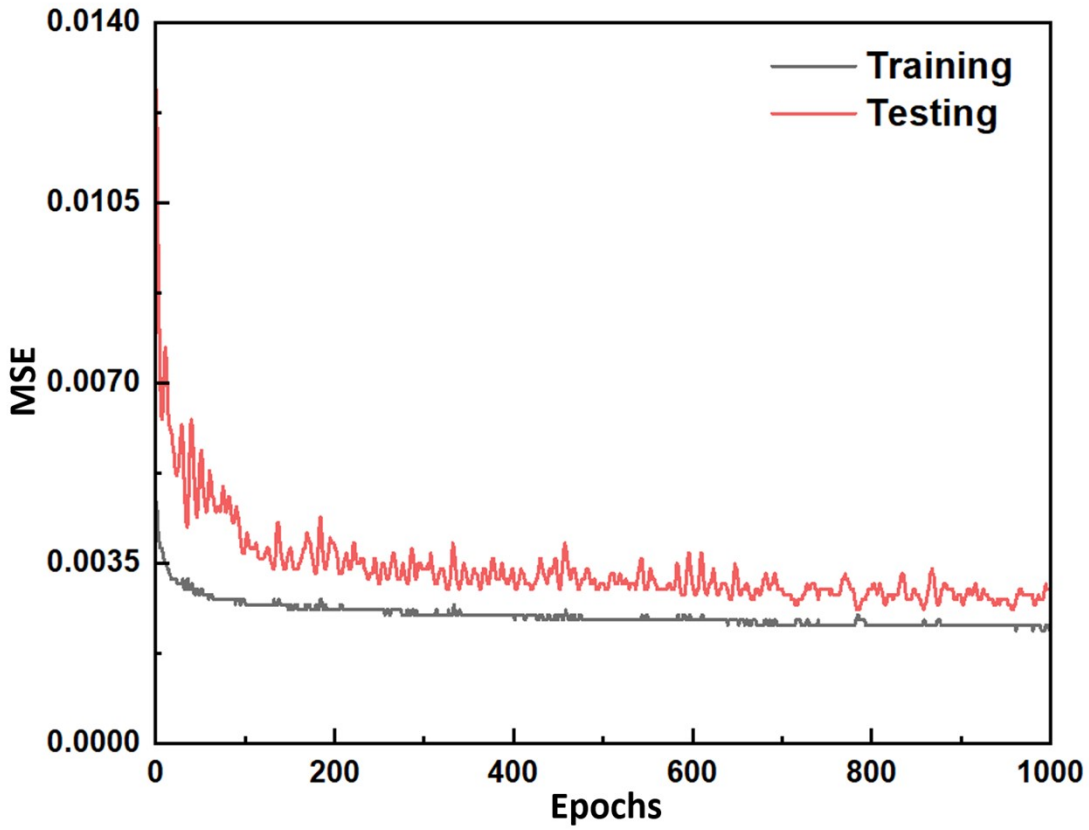

Figure S17. The evaluation of mean square error along with the number of iterations in ANN model

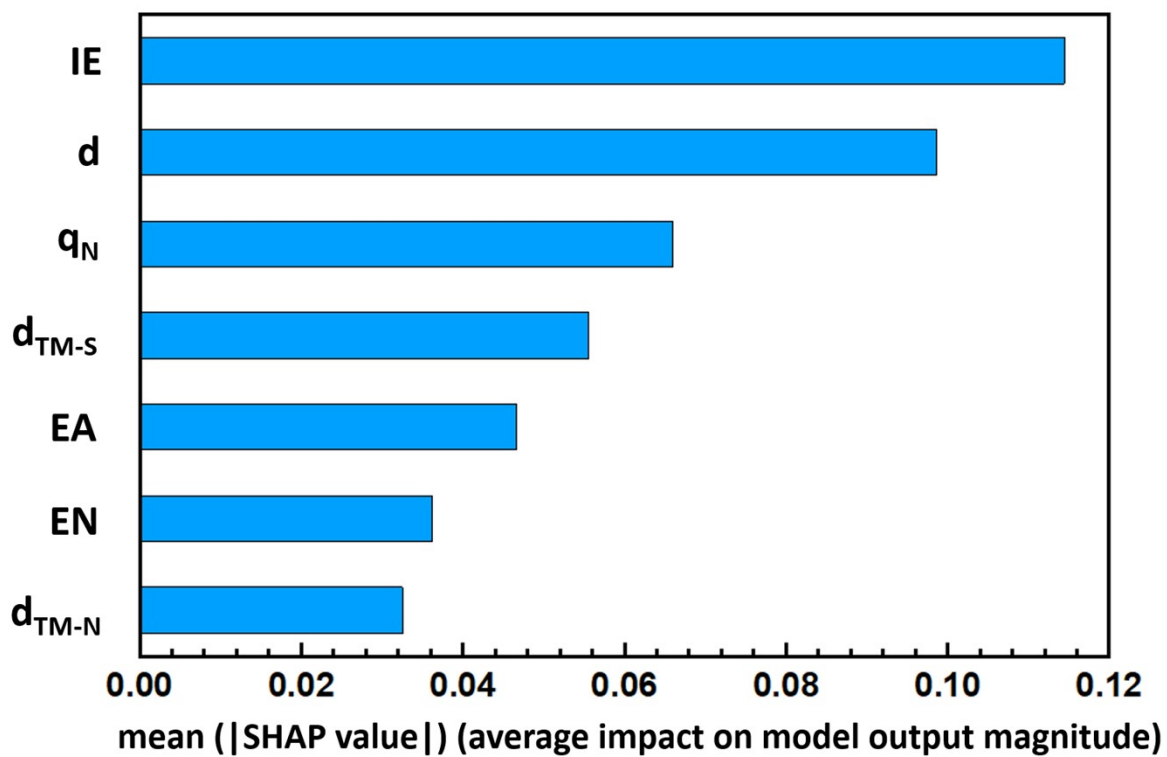

**Figure S18.** Comparison of SHAP values to analyze the feature importance of ANN model
